# Supplementary material
Source: PubMed Central journal article supplement (PMC5354186)
Supplement: supp_tpc.16.00568_TPC2016-00568-RAR2_Supplemental_Material.pdf [file supp_tpc.16.00568_TPC2016-00568-RAR2_Supplemental_Material.pdf]

1 Supplemental Data. Lu et al. (2017). Plant Cell 10.1105/tpc.16.00568

2

3 Supplemental Dataset 1

4

5 AtSPT5

6 1 msqysdddys heddsemede deedeypers srkgrsgkkr grsnsdsdgr

7 rgskkkssgs

8 61 afidwevevd ddveddddv dvedgkqqlk fgdfslcfiv sgeadlpned

9 sdhrrqyyqr

10 121 gfhphedvd elektlerl stkyakddye lddvndvdqq allpsvrpk

11 lwlvkcaigr

12 181 erevavclmq kivdrgsefk irsaialdhl qnyvyieadm eahvkeaikg

13 mrniyangki

14 241 llvpikemta vlsveskaid lsrdswwrmk lgiykgdlaq vvdvndvrkr

15 vtvkliprid

16 301 lqalankleg tenvkkkafa ppprfmnide arelhirveh rrdpmtgdyf

17 eniggmlfkd

18 361 gflykkvstk siaaqnvtpt fdelerfkrp nengeidfvd estlfanrk

19 ghfmkgdavi

20 421 vikgdlnlk gwiekvdeen vlirsemdk pnpiaavngre lckyfepgnf

21 vkvsvgiheg

22 481 gtgmivkvdq hmliilsdt kehicvfadh vaksaevtg vtkigdyelh

23 dlvilssdfs

24 541 gvilkldsea iqilkgvpsd sevsivkase ikykiwkin vqdryknvva

25 vkdvrvieg

26 601 pskgkqgpv qiykgvlfi drhnlehtgf ictrcsscvl aggnfktpal

27 vppsprfqr

28 661 admgynpgag grhqggrgr gddhlvgtyv kirlgpfkgy sgrlvevkd

29 lvrveleaki

30 721 vtverkaisd mtdnvvatp ynmgsqtpmh psrtplhpcm tpmrhsgatp

31 ihdgmrtpmr

32 781 grawnpympm spprdnwedg npgswgtspy eaatpgsdwg sstpgrssyr

33 dagtpinnan

34 841 apspmtpsst sylpttgggq amtpgtdldv msldiggdae trfipgilvn

35 vhkagedrnp

36 901 gvirdvlpdg scvvalghrg egetiratqn kvslvcpkkn ervkilggky

37 cgstakvige

38 961 dgqdgivkld esldikilk1 tilaklvhe

39

40 AtGTA2

41 1 mprsrdedde ldgdyealdl eeeeeedeee eeergrgggg srrkrgrsnf

42 iddyaeedsq

43 61 eedddeddyg ssrggkgaas krkkpsasif ldreahqvdd edeeedeae

44 ddfivdngtd

45 121 lpdergdrry errflprden dedvedlerr iqerfssrhh eeydeeatv

46 eqqallpsvr

47 181 dpklwmvka igrerevavc lmqkfidrga dlqirsvval dhlknfiyve

48 adkeahvkea

49 241 ikgmriyan qkillvpiere mtdvlsvesk aidlsrdtw rmkigtykgd

50 lakvvdvndv

51 301 rqrvtvklip ridlqalask ldgrevskkk afvppprfmn idearelhir

52 verrrdhmtg

53 361 dyfeniggml fkdghyqkv slksitvqnv tptfdelekf nkpsengegd

54 fgglstlfan

55           421 rkkghfmkgd avivikgdlk nlkgwvekvd eenvlirsev kglpdplavn  
56 erelckfyep  
57           481 gnhvkvvsgt hegatgmvvk vdqhvliils dttkhevrvf adhvvessev  
58 ttgvtkigdy  
59           541 elhdlvlldn lsfvgiirle neafqvlkgv pdrpevalvk lreikcklek  
60 kinvgdrykn  
61           601 viavkddvrv iegpskgkqg pvkhiykgvl fiydrhhleh agficakcts  
62 civvggsrsg  
63           661 anrnggdsls rygnfkapap vpsspgrfqr grgggynnsgrhgggrgrg  
64 ddsllgttvk  
65           721 irlgpfkgyr gpvvevkgs vrvelemkiv tvdrgaisdn vattpfrdts  
66 rysmgsetpm  
67           781 hpsrtplhpy mtpmrds gat pihdgmrtpm rdrawnpytp mspprdnwed  
68 gnpgsrgtsp  
69           841 qyqpgspps ayeaptpgsg wastpggsys dagtprdhgs ayanapspyl  
70 pstpgqpmtp  
71           901 ssasylpgtp ggqpmtpgtg ldvmspvigg daeawfmpdi lvdihkaged  
72 tdvgvirdvs  
73           961 dgtckvslgs sgegdtimal pseleiipr ksdrvkiyvgg qyrgstgkli  
74 gidgsdgivk  
75           1021 iddnldvkil dlallakfvq p  
76  
77 HsSPT5  
78           1 msdsedsnfs eederssd geeaevdeer rsaagsekee epedeeeeee  
79 eeeydeeeee  
80           61 eddrppkpk rhggfildea dvddeyeded qwedgaedil ekeeieasni  
81 dnvvldehrs  
82           121 garrlqnlwr dqreeelgey ymkkyakssv getvyggsde lsdditqqql  
83 lpgvkdpnlw  
84           181 tvkckigeer ataislmrkf iayqftdtpl qiksvvapeh vkgyiyveay  
85 kqthvkqaie  
86           241 gvgnlrlgyw nqgmvpikem tdvlkvvkev anlkpkswvr lkrgiykddi  
87 aqvdyvepsq  
88           301 ntislkmipr idydrikarm slkdwfakrk kfkrrppqrlf daekirslgg  
89 dvasdgdfli  
90           361 fegnrysrkg flfksfamsa vitegvkptl selekfedqp egidlevvte  
91 stgkerehnf  
92           421 qpgdnvevce gelinlqgki lsvdgnkiti mpkhedlkdm lefpaqelrk  
93 yfkmgdhvk  
94           481 iagrfeqdtg livrveenfv ilfsdltmhe lkvprdlql csetasgvdv  
95 ggqhewgelv  
96           541 qldpqtvvgi vrleretfqv lnmygkvvtv rhqavtrkkd nrfavaldse  
97 qnnihvkdiv  
98           601 kvidgphsgr egeirhlfrs faflhckklv enggmfvckt rhlvlaggsk  
99 prdvtnftvg  
100           661 gfapmspris spmhpsaggq rggfgspggg sggmsrgrgr rdneligqtv  
101 risqgpykgy  
102           721 igvvkdates tarvelhstc qtisvdrqrl ttvgsrrpgg mtstygrtpm  
103 ygsqtpmygs  
104           781 gsrtpmysq tplqdsrtp hygsqtplhd gsrtpaqsga wdpnnpntps  
105 raeeeyeyaf  
106           841 ddeptspqa yggtpnpqtp gypdpsspqv npqynpqtpg tpamyntdqf  
107 spyaapsqg

108           901 syqpspspqs yhqvapspag yqnthspasy hptpspmayq aspspspvgy  
109 spmtpgapsp  
110           961 ggynphtpgs gieqnssdwv ttdiqvkvrđ tyldtqvvvgg tgvirsvtgg  
111 mcsvylkdse  
112           1021 kvvsissehl epitptknnk vkvilgedre atgvllsidg edgivrmdld  
113 eqlkilnlrf  
114           1081 lgkllea  
115  
116 Dm SPT5  
117           1 msdsevsnms dsgsedgsis nksqrsarsk srsrsrsgsr gsrsvsrsrs  
118 rsqsghsrsg  
119           61 sespqrrdnr gksdesgeee eppgedids eeydeeendd hprkkkkker  
120 fggfiideae  
121           121 vddevdedde weeganeigi vgneidelgp tardieirrr gtnlwdtqke  
122 deieeylrkk  
123           181 yadesiakrh fgdggeemsd eitqqtllpg ikdplnmvk crigeekata  
124 lllmrkylty  
125           241 lntddplqik siiapegvkg yiyleaykqt hvktcidnvg nlrngkwkqe  
126 mvpikemtdv  
127           301 lkvvkeqvgl kvkqwrkr glykddiaqv dyvdlaqnqv hklpridy  
128 trmrgalrtt  
129           361 atesddskrk krrpaakpf dpeavraigg evhsdgdfll fegnrysrkg  
130 flyknftmsa  
131           421 ilsdgvkptl aelerfeesp eevnleimgt vkddptmahs fsmgdnvevc  
132 vgdlenlqak  
133           481 ivaidgtmit vmpkhqdlkd plifikaselr kyfktgdhar vlagryeget  
134 gliirveptr  
135           541 vvlvsdltnh elevlprdlq lcsdvatgvd clgqfqwgdv vqldsqnvvg  
136 ivrlerenfh  
137           601 vlgmngkcie ckptalhkrk enrhtvalda dqnqirrrdv vkvmegphag  
138 rsgeikhlyr  
139           661 slafhlcrmy tenggifvck trhlqlaggs kttvsnagiv gglgfmspri  
140 qspmhpsggr  
141           721 garggarggr ggfrvtdre ilgktikisg gpykgavgiv kdatestarv  
142 elhtscqtis  
143           781 vdrnhiaivg vtgkegsrst ygrtpartpg ygaqtpsytā agsktplvgs  
144 qtpnwdtdtr  
145           841 tpygtmtpsh dgsmtprhga wdptanttpa rnndfdysle epspspgynp  
146 stpgyqmtsq  
147           901 fapqtptgly gsdrsyspfn pspspapsy pvgymntpsp styspntpgg  
148 ipqspynpqt  
149           961 pgasldssmg dwcttdievr ihthddtdlv gqtgiirtvs ngvcsvflrq  
150 edrsvsivse  
151           1021 hlapvlpcng defkiiygdd resvgrvlsk dgdvfvcrin eeikllpinf lckmksid  
152  
153 Sc SPT5  
154           1 msdnsdtnvs mqdhdqqfad pvvvpqstdt kdentsdkdt vdsgrvttte  
155 steraestsn  
156           61 ippldgeeke aksepqqped naetaateqv sssngpatdd agatlntdss  
157 eaneivkkee  
158           121 gsderkrpre edtknsdgdđ kdegdnkded ddedddddd deddddeapt  
159 krrrqernrf  
160           181 ldieaevsdd ededededs elvregfith gddeddeasa pgarrddrlh  
161 rqldqdlnt

162           241 seedaqlak elrerygrss skqyraaaqd gyvpqrfllp svdtatiwgv  
163 rcrpgkekel  
164           301 irkllkkkfn ldramgkkkl kilsifqrdn ytgriyieap kqsviekfcn  
165 gvpdiyisqk  
166           361 llipvqelpl llkpnksddv aleegsyvri krgiykgdla mvdqisennl  
167 evmlkivprl  
168           421 dygkfdeidp ttqqrksrrp tfahrappql fnptmalrld qanlykrddr  
169 hftyknedyi  
170           481 dgylyksfri qhvetkniqp tveelarfgs kegavdltsv sqsikkaqaa  
171 kvtfqpgdri  
172           541 evlngeqrgs kgivtrttkd iatiklngft tplefpistl rkifepgdhv  
173 tvingehggd  
174           601 aglvlmvegg qvtfmstqts revtitannl sksidttats seyalhdive  
175 lsaknvacii  
176           661 qaghdifkvi detgkvstit kgsilskint ararvssvda ngneikigdt  
177 ivekvgsrre  
178           721 gqvlyiqtqq ifvvskkive nagvfvnps nveavaskdn mlsnkmdlsk  
179 mnpeiiskmg  
180           781 ppssktfqqp iqsrgrreva lgktvrirsa gykgqlgivk dvngdkatve  
181 lhsknkhiti  
182           841 dkhltyynr eggegityde lvnrrgrvpq armgpsyvsa prnmatggia  
183 agaaatssgl  
184           901 sggmtpgwss fdggktpavn ahggsggggv sswggastwg gqnggasaw  
185 ggagggasaw  
186           961 ggggtgatst wggasawgnk sswggastwa ssgesngams twggtgdrsa  
187 yggastwgn  
188           1021 nnnkstrdgg asawgnqddg nrsawnnqgn ksnyggnstw ggh  
189
